# Supplementary material for: Insights into hydroelectric nanogenerators: numerical simulation and experimental verification
Source: Royal Society of Chemistry journal article supplement (doi:10.1039/d4ta02852j), 2024-01-01
Supplement: d4ta02852j1.pdf [file d4ta02852j1.pdf]

# Insights into Hydroelectric Nanogenerators: Numerical Simulations and Experimental Data Analysis

## Materials and Methods.

### 1.1 Chemicals and Materials

Wool cloth (175.5 g/m<sup>2</sup>, 0.29 mm in thickness) was purchased from Nanshan Worsted Woolen Factory, Yantai City, China and cut into stripes (4 × 0.5 cm). Lithium fluoride (LiF), titanium aluminium carbide 312 (Ti<sub>3</sub>AlC<sub>2</sub>), sodium chloride (NaCl), lithium chloride (LiCl), hexadecyltrimethylammonium bromide (CTAB), urea, lactic acid, and ammonia solution were obtained from Sigma-Aldrich, Australia. All the chemicals were of analytical grade and used as received. KB nanoparticles were obtained from Lion King Co., Japan. Zinc electrode wires (Zn) with a diameter of 0.6 mm were purchased from the local market in Geelong, Australia. A resistor (150 Ω) and a supercapacitor (47 mF, 5.5 VDC) were purchased from Jaycar Electronics, Geelong, Australia. A Milli-Q ultrapure water purification system (Merck) was used to prepare deionized water (DI water) with a resistivity of approximately 1.6 × 10<sup>-4</sup> s·m<sup>-1</sup>.

### 1.2 Preparation of ink

A KB ink was prepared by dispersing KB powders (10 g) in DI water (1 L) with the assistance of CTAB (20 g) (mass ratio of KB to CTAB was 1:2) under sonication for 4 h. SMX nanosheets were prepared via selectively etching aluminium from Ti<sub>3</sub>Al<sub>2</sub>C MAX phase with the minimally intensive layer delamination (MILD) method [1-3]. Lithium fluoride (LiF, 0.5 g) was first added to HCl acid (9 M, 10 mL) under stirring. After 5 min, Ti<sub>3</sub>AlC<sub>2</sub> powder (0.5 g) was added to the acidic solution and stirred for one day at 35 °C. The resulting solution was centrifuged at 1331 rcf for 10 min, and the precipitate was washed with DI water several times until the pH of the supernatant reached around 6.5. The sediment was dispersed in DI water and centrifuged at 244 rcf for 20 min to remove multilayer MXene sediments, resulting in a dispersion of single-

layer MXene. The obtained SMX was diluted to a concentration of 23 mg/mL as SMX ink and stored in a freezer (-20 °C) for subsequent use.

### 1.3 Preparation of artificial sweat and fabrication of the SMX-based HENGs

To prepare HENGs, the pristine wool stripes ( $0.5 \times 4 \text{ cm}^2$ ) were treated with a plasma cleaner (John Morris, air plasma) at 64 W for 2 min under 0.05 mbar to improve their hydrophilicity [4]. The wool stripes were then dipped in the SMX, OKB ink or their mixtures in different OKB/SMX ratios for 3 s and dried in a vacuum oven (Binder Vacuum Oven, Model VD 23, 0.9 kW) at 53 °C for 2 h. Zn electrodes were then placed on both ends of the coated wool stripes to produce HENGs.

### 1.4 Analysis and testing procedure of the HENGs

The electrical output performance of the HENGs was analyzed and tested. The negative and positive probes of a digital multimeter (Keysight, 34454A) were connected to the two ends of the devices. Different solutions (DI water, sweat, 0.7, 1.4, 2.1, and 2.8 M NaCl) ( $40 \mu\text{L}$ ) were pipetted onto one end of the wool stripes (negative electrode). The short-circuit current ( $I_{SC}$ ), resistance, and open circuit voltage ( $V_{OC}$ ) were recorded. To obtain high voltages and currents, multiple cloth stripes were connected in series within one device.

**Table S1** FEM parameters and their values

| <b>Variable</b> | <b>Value [unit]</b> | <b>Description</b>             |
|-----------------|---------------------|--------------------------------|
| $s_1$           | -                   | Water phase                    |
| $s_2$           | -                   | Air phase                      |
| $W$             | 0.5 [cm]            | Length of the meshed domain    |
| $H$             | 4 [cm]              | Width of the meshed domain     |
| $th$            | 0.3 [mm]            | Thickness of the meshed domain |
| $\gamma$        | 3.52 [N/m]          | Surface tension                |

|                |                                                                         |                                                        |
|----------------|-------------------------------------------------------------------------|--------------------------------------------------------|
| $\theta$       | $0^\circ$                                                               | Water contact angle in HENGs                           |
| $R_c$          | $8.8 \times 10^{-7}$ [m]                                                | Pore size                                              |
| $p_{ec}$       | $2\gamma\cos\theta/R_c$                                                 | Inlet capillary pressure                               |
| $\lambda_p$    | 2                                                                       | Pore size distribution index                           |
| $\epsilon_p$   | 0.6                                                                     | Porosity                                               |
| $k$            | $\epsilon_p/8 * R_c^2$                                                  | Permeability                                           |
| $\rho_{water}$ | 1000 [kg·m <sup>-3</sup> ]                                              | Water density                                          |
| $\rho_{air}$   | 1 [kg·m <sup>-3</sup> ]                                                 | Air density                                            |
| $\mu_{water}$  | $1.002 \times 10^{-3}$ [Pa·s]                                           | Dynamic viscosity of water                             |
| $\mu_{air}$    | $1.76 \times 10^{-5}$ [Pa·s]                                            | Dynamic viscosity of air                               |
| $\epsilon_0$   | $8.85 \times 10^{-12}$ [F·m <sup>-1</sup> ]                             | Vacuum permittivity                                    |
| $\epsilon_r$   | 80                                                                      | Relative permittivity of water                         |
| $\zeta$        | -45 [mV]                                                                | Zeta potential of SMX                                  |
| $\sigma$       | 485 [ $\mu$ S·cm <sup>-1</sup> ]                                        | Fluidic conductivity                                   |
| $I$            | $v * \epsilon_0 * \epsilon_r * \zeta * S_1 / k * f(t)$                  | Streaming current                                      |
| $V$            | $v * \epsilon_0 * \epsilon_r * \zeta * S_1 / k * \sigma * f(t)$         | Streaming potential                                    |
| $p_{VA}$       | $2.31 \times 10^3$ [Pa]                                                 | Partial pressure of vapor in saturated air at 293.15 K |
| $p_{VA}'$      | $p_{VA} \times RH$                                                      | Partial pressure of water vapor in air at given RH     |
| $RH$           | 60%                                                                     | Relative humidity                                      |
| $p_{in}$       | 0 [Pa]                                                                  | Inlet pressure in the HENG channel                     |
| $p_{evap}$     | $3.5 \times 10^6$ [Pa]                                                  | Evaporation pressure                                   |
| $p_{out}$      | $p_{VA}' - p_{ec} * (s_1)^{-\frac{1}{lp}} * step1(s1) - \rho_{air} * H$ | Outlet pressure in SMX channel                         |

|             |                              |                      |
|-------------|------------------------------|----------------------|
| $T$         | 20 [°C]                      | Temperature          |
| $M_{water}$ | 18 [g·mol <sup>-1</sup> ]    | Water molar weight   |
| $M_{NaCl}$  | 58.44 [g·mol <sup>-1</sup> ] | Molar weight of NaCl |

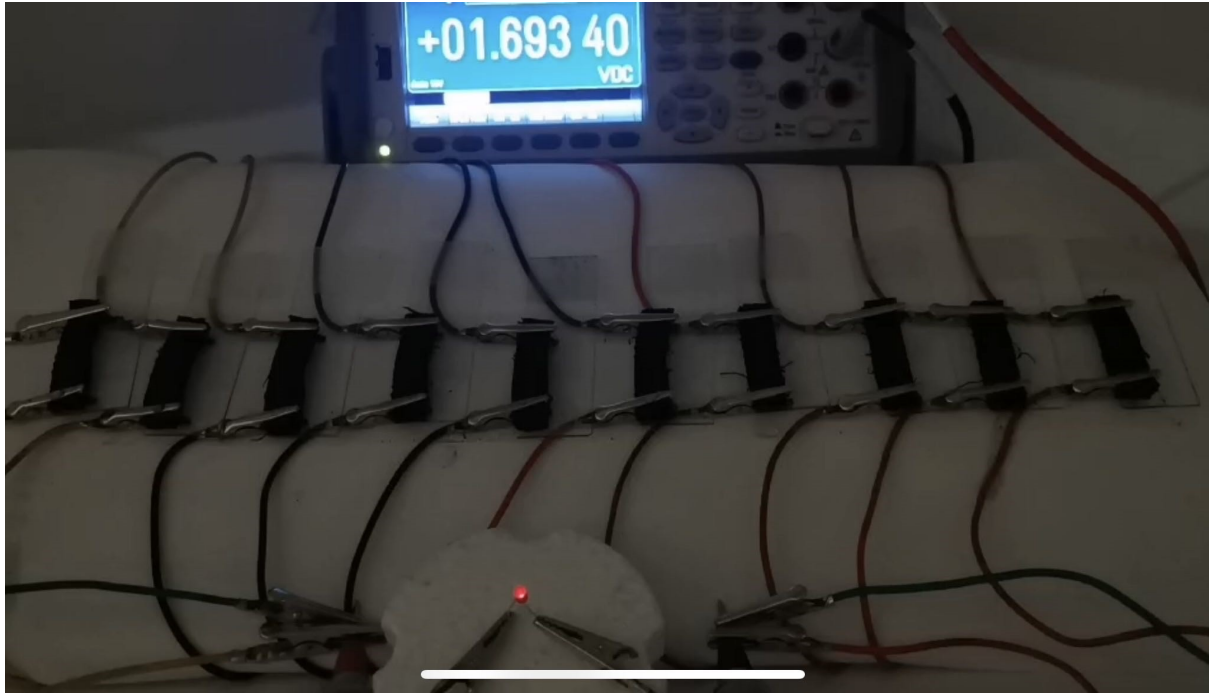

**Fig. S1** HENG with a series of 10 × 10 KB6/W used to light up LED. Reprinted with permission from [5], copyright 2023, Elsevier.

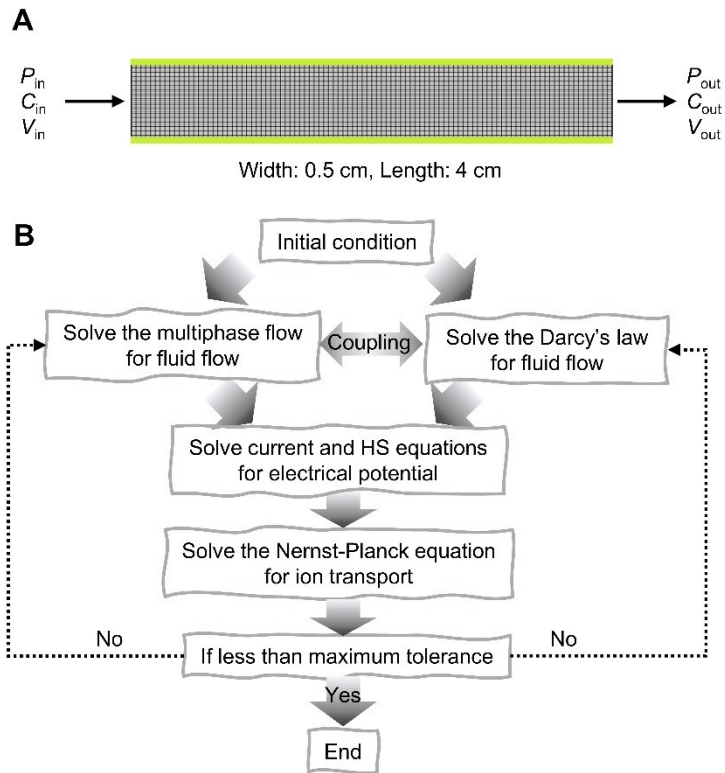

**Fig. S2** Numerical simulations of electrical performance of HENGs. (A) Domain of the HENG model. (B) Flow chart for the proposed HENG model. Reprinted (A) with permission from [6], copyright 2024, Cell Press.

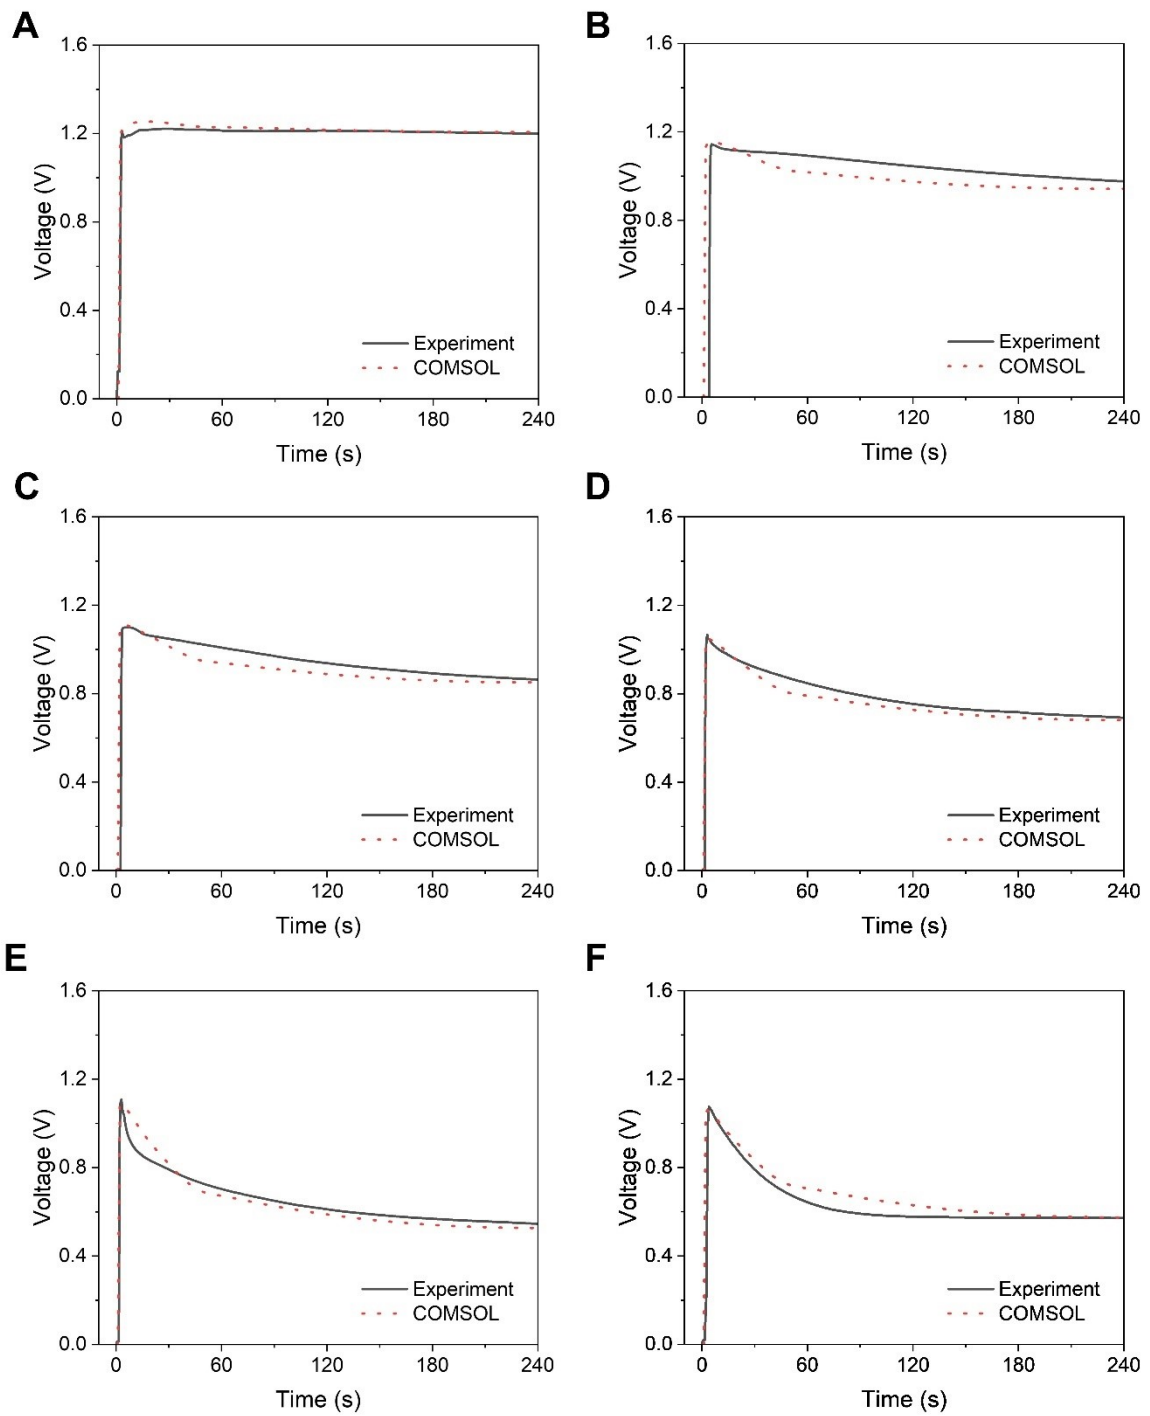

**Fig. S3** Experimental and simulated electrical performance of KB-based HENGs with various immersions by 5 M NaCl. (A-F) 1-6 immersions, respectively.

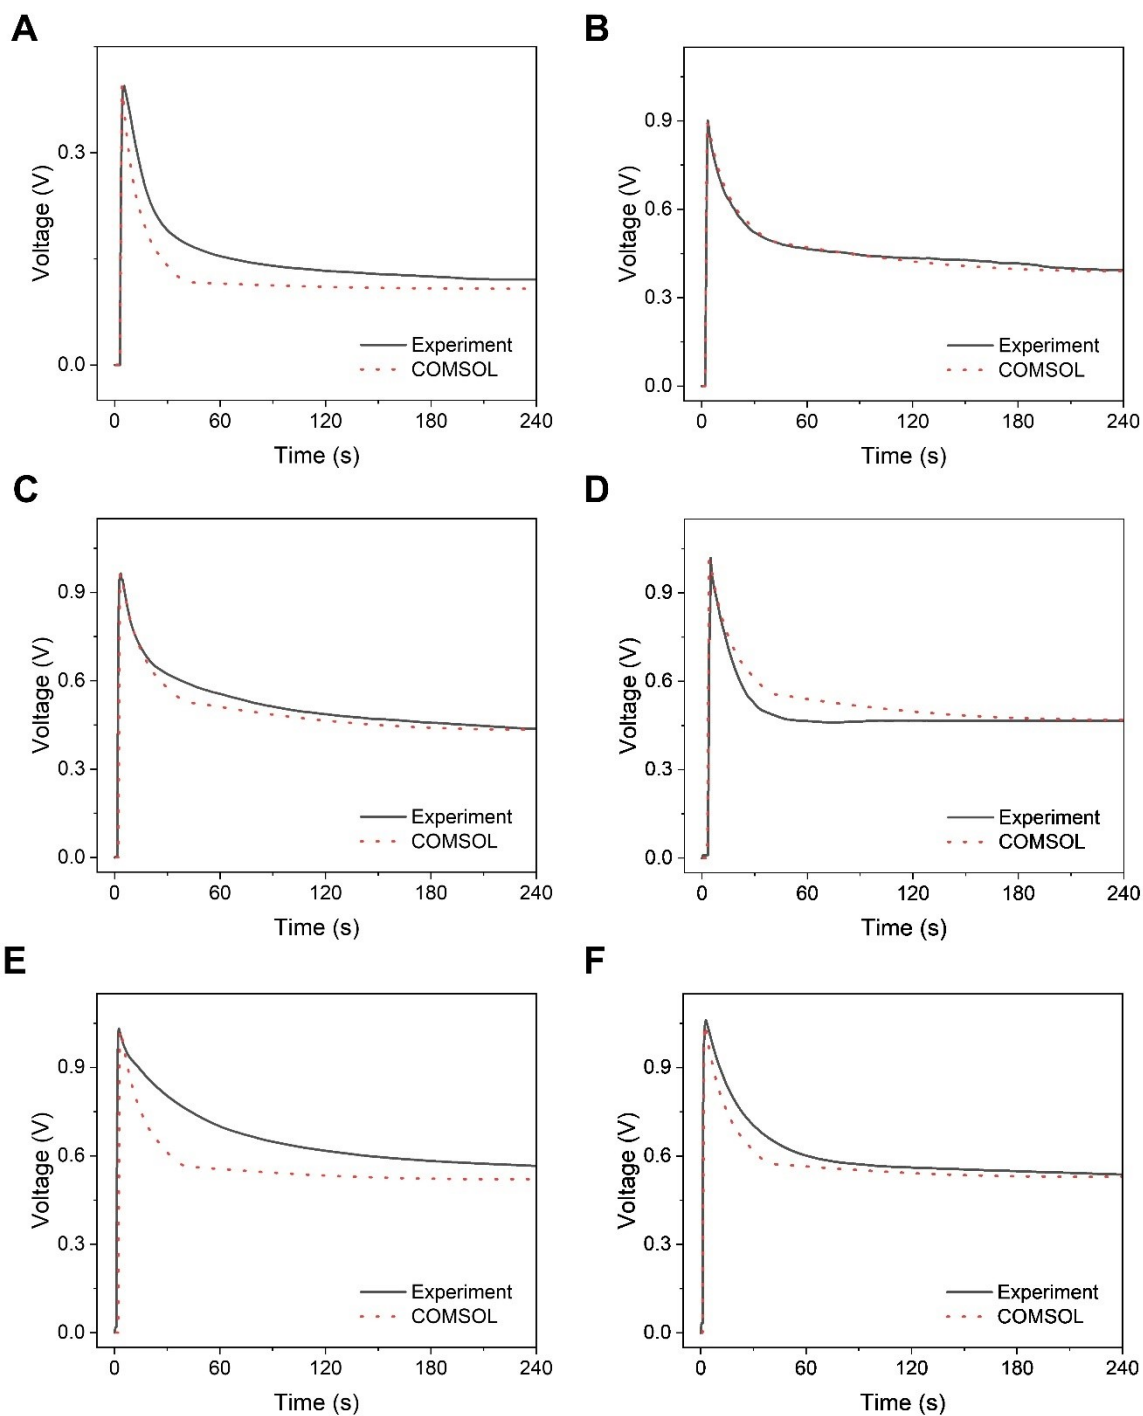

**Fig. S4** Experimental and simulated electrical performance of KB6/W-based HENGs with NaCl solutions of various concentrations. (A-F) 0, 0.7, 1.4, 2.1, 2.8, and 3.5 M NaCl, respectively.

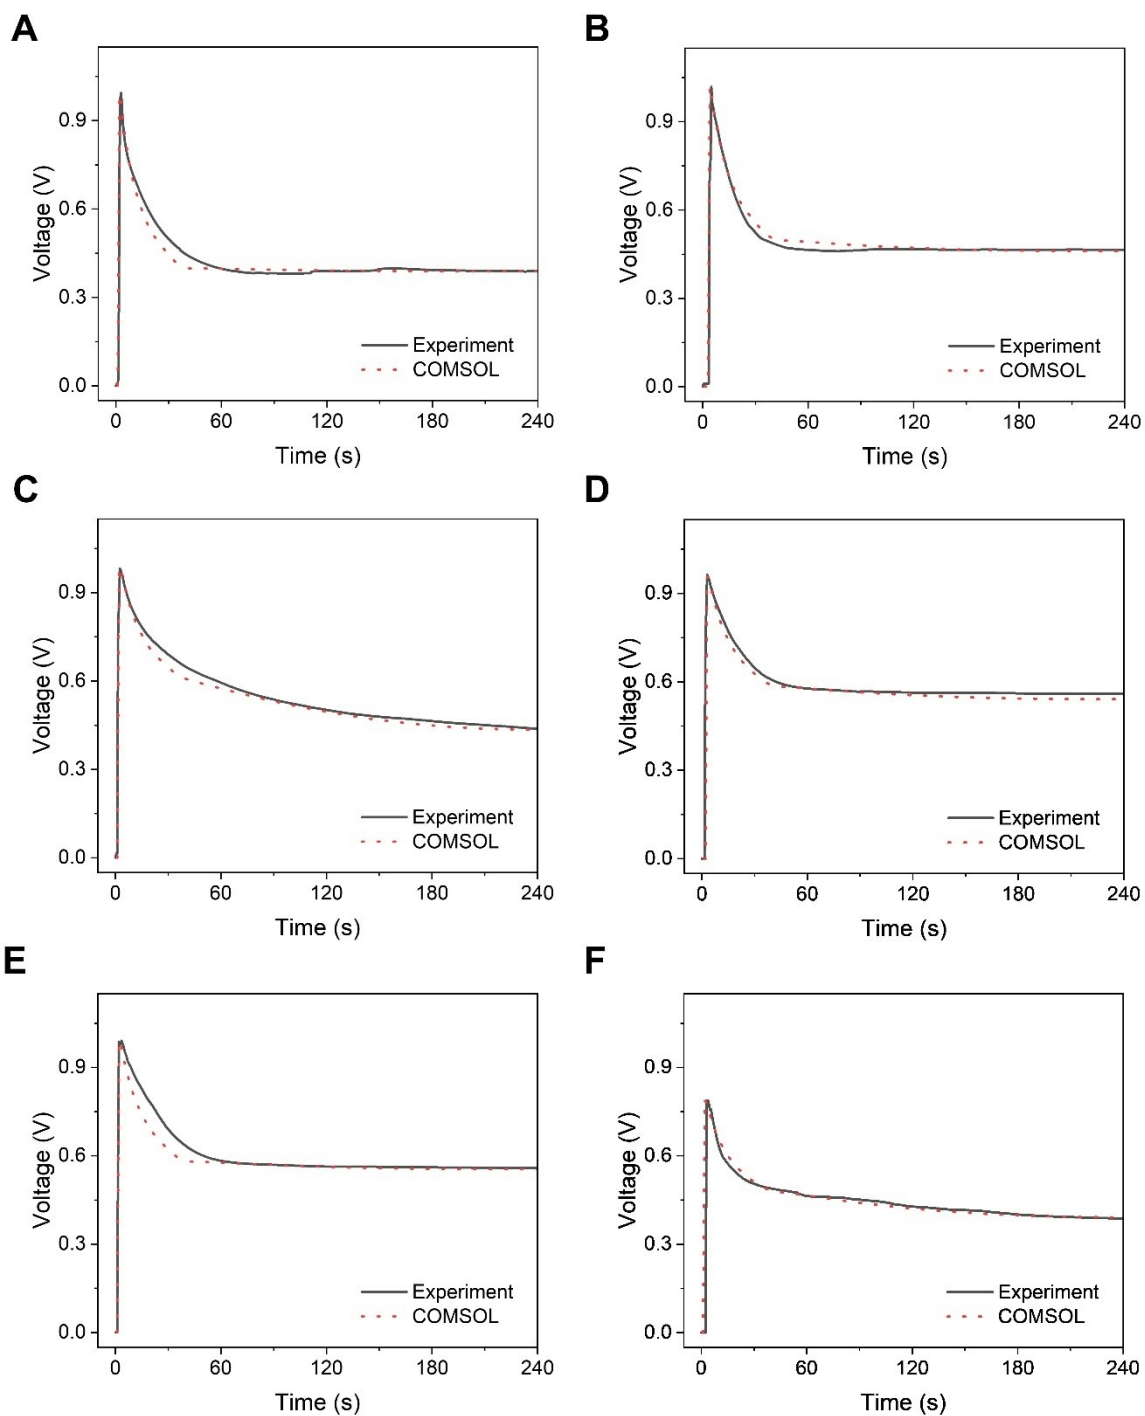

**Fig. S5** Experimental and simulated electrical performance of KB6/W-based HENGs with various salts. 2.1 M (A-E) LiCl, NaCl, KCl, CaCl<sub>2</sub>, and MgCl<sub>2</sub>, respectively. (F) sweat.



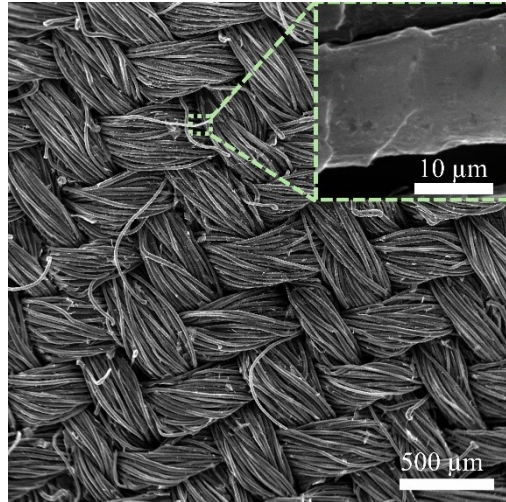

**Fig. S6** SEM image of KB@SMX-based HENG.

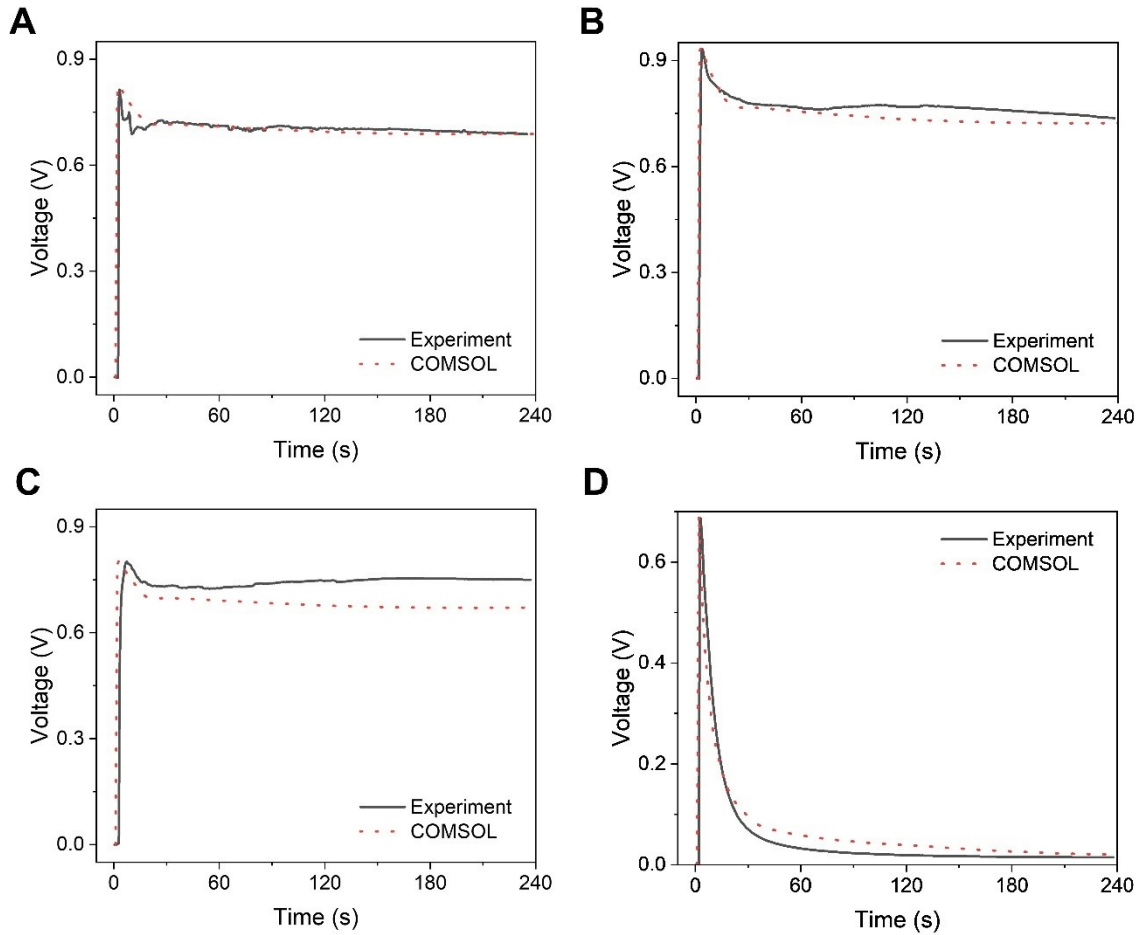

**Fig. S7** Experimental and simulated electrical performance of KB@SMX-based HENGs with various ratio of KB:SMX by sweat. KB:SMX ratio of (A) 1:0, (B) 1:1, (C) 1:2, and (D) 0:1, respectively.

## References

1. Usman, K.A.S., et al., *Tough and Fatigue Resistant Cellulose Nanocrystal Stitched Ti<sub>3</sub>C<sub>2</sub>Tx Mxene Films*. *Macromolecular Rapid Communications*, 2022. **43**(11): p. 2200114.
2. Usman, K.A.S., et al., *Inducing Liquid Crystallinity in Dilute Mxene Dispersions for Facile Processing of Multifunctional Fibers*. *Journal of Materials Chemistry A*, 2022. **10**(9): p. 4770.
3. Usman, K.A.S., et al., *Sequentially Bridged Ti<sub>3</sub>C<sub>2</sub>Tx Mxene Sheets for High Performance Applications* *Advanced Materials Interfaces*, 2021. **8**(7): p. 2170040.
4. Kan, C.W., et al., *Plasma Pretreatment for Polymer Deposition—Improving Antifelting Properties of Wool*. *IEEE Transactions on Plasma Science*, 2010. **38**(6): p. 1505.
5. Su, H., et al., *Self-Operating Seawater-Driven Electricity Nanogenerator for Continuous Energy Generation and Storage*. *Chemical Engineering Journal Advances*, 2023. **14**: p. 100498.
6. Su, H., et al., *Efficient Energy Generation from a Sweat-Powered Wearable Mxene-Based Hydroelectric Nanogenerator*. *Device*, 2024. **2**(5): p. 100356.
